# Supplementary material for: Eye-Tracking Technology in Online Real Estate Rental
Source: Hindawi journal article supplement (doi:10.1155/2021/8851657), 2021-01-16
Supplement: f1 [file 8851657.f1.xlsx]

## Sheet: 词条检索
任务3 & 任务6 “五道口”			无首字母引导		有首字母引导
被试情况
序号	姓名	性别	Time to First Fixation	Fixation Before	Time to First Fixation	Fixation Before		原始															比例
1	常家闻	男	2.81	16	1.73	10		Time to First Fixation （均值/秒）															Time to First Fixation （均值/秒）
2	党元萌	女	1.41	5	3.43	12			无首字母引导	有首字母引导														无首字母引导	有首字母引导
3	胡雨梦	女	1.56	7	0	0		词条1	2.1	1.9													词条1	1	0.904762
4	李婉琪	女	2.96	11	2.58	9		词条2	4.32	3.43													词条2	1	0.793981
5	刘博翔	男	1.75	7	3.44	13		词条3	3.72	2.38													词条3	1	0.639785
6	农珺清	女	1.94	10	0.6	3
7	屈方元	男	1.39	7	0	0		Fixation Before（均值/个）															Fixation Before（均值/个）
8	王乐文	男	1.52	7	2.89	11			无首字母引导	有首字母引导														无首字母引导	有首字母引导
9	王巍	女	2.17	8	1.47	6		词条1	9	7.7													词条1	1	0.855556
10	王宣璎	女	2.49	10	0.93	5		词条2	16.25	13.55													词条2	1	0.833846
11	王雪珺	女	1.54	7	5.92	23		词条3	14.75	9.7													词条3	1	0.657627
12	王玉	女	2.93	11	0	0
13	吴夏辉	男	2.03	8	1.36	6
14	徐笑颖	女	3.03	12	1.94	7
15	张银玲	女	3.46	15	4.32	19
16	赵琳琳	女	1.06	7	0.57	3
17	宗文静	女	1.34	5	3.01	12
18	邹秦辉	女	1.94	8	1.74	7
19	刘丽娟	女	1.64	6	0	0
20	李思佳	女	3.06	13	2.03	8
Sum			42.03	180	37.96	154
Mean			2.1015	9	1.898	7.7
任务4 & 任务7 “团结湖”			无首字母引导		有首字母引导
被试情况
序号	姓名	性别	Time to First Fixation	Fixation Before	Time to First Fixation	Fixation Before
1	常家闻	男	2.49	13	3	16
2	党元萌	女	2.18	9	2.11	8
3	胡雨梦	女	3.13	13	3.3	12
4	李思佳	女	14.03	50	2.54	12
5	李婉琪	女	5.15	12	1.58	6
6	刘博翔	男	2.67	10	6.06	21
7	刘丽娟	女	2.46	10	4.93	18
8	农珺清	女	0.88	5	0.73	3
9	屈方元	男	3.94	19	5.25	21
10	王乐文	男	3.95	15	1.44	7
11	王巍	女	0.57	3	1.9	7
12	王宣璎	女	2.59	12	1.93	8
13	王雪珺	女	4.68	21	1.5	4
14	王玉	女	4.15	16	8.06	27
15	吴夏辉	男	3.53	14	1.59	7
16	徐笑颖	女	3.71	14	2.54	9
17	张银玲	女	11.78	27	5.95	28
18	赵琳琳	女	4.75	21	5.14	21
19	宗文静	女	4.75	19	2.16	9
20	邹秦辉	女	5.05	22	6.79	27
Sum			86.44	325	68.5	271
Mean			4.322	16.25	3.425	13.55
任务4 & 任务7 “石榴庄”			无首字母引导		有首字母引导
被试情况
序号	姓名	性别	Time to First Fixation	Fixation Before	Time to First Fixation	Fixation Before
1	常家闻	男	2.09	12	1.46	7
2	党元萌	女	8.41	32	1.99	9
3	胡雨梦	女	4.85	20	5.8	25
4	李思佳	女	1.96	9	1.62	7
5	李婉琪	女	1.58	6	2.48	10
6	刘博翔	男	2.29	8	2.66	11
7	刘丽娟	女	2.85	9	5.51	22
8	农珺清	女	0.46	2	1.15	5
9	屈方元	男	0.93	4	0.54	3
10	王乐文	男	2.31	8	1.21	5
11	王巍	女	2.38	9	0.35	1
12	王宣璎	女	3.37	15	0.51	2
13	王雪珺	女	3.55	14	1.17	5
14	王玉	女	3.65	13	2.94	8
15	吴夏辉	男	9.23	33	1.02	5
16	徐笑颖	女	2.92	11	0.64	2
17	张银玲	女	3.91	17	3.18	15
18	赵琳琳	女	5.34	21	7.41	28
19	宗文静	女	6.55	29	1.79	7
20	邹秦辉	女	5.72	23	4.17	17
Sum			74.35	295	47.6	194
Mean			3.7175	14.75	2.38	9.7

## Sheet: 列表页
合租-列表页
序号	姓名	First Fixation Duration			Fixation Duration			Fixation Count			Visit Duration			Visit Count
		info	pic	price	info	pic	price	info	pic	price	info	pic	price	info	pic	price
1	常家闻	0.1	0.22	0.35	19.28	1.97	9.84	62	5	36	19.65	2.3	9.84	10	3	7
2	党元萌	0.27	0.25	0.18	72.17	0.68	14.3	195	3	48	77.9	0.68	14.3	16	2	16
3	胡雨梦	0.1	0.23	0.17	29.46	1.08	5.45	89	4	20	30.98	1.08	5.6	11	3	6
4	李思佳	0.09	0.18	0.18	19.73	13.61	5.5	64	44	21	20.36	14.07	5.5	20	14	7
5	李婉琪	0.2	0.23	0.28	85.87	4.66	11.21	291	18	37	96.23	4.88	12.21	17	9	9
6	刘博翔	0.32	0.25	0.43	65.87	4.81	15.77	169	15	56	66.6	4.81	15.77	21	8	13
7	刘丽娟	0.23	0.12	0.18	20.83	3.33	4.55	63	10	18	24.88	3.51	5.23	10	4	6
8	农珺清	0.1	0.3	0.2	30.46	6.86	8.83	88	23	33	30.6	6.86	8.83	12	4	7
9	屈方元	0.26	0.5	0.25	48.98	1.98	6.29	129	6	20	50.23	1.98	6.29	14	5	8
10	王乐文	0.25	0.23	0.17	46.8	9.16	6.48	126	26	24	47.86	9.16	6.68	21	11	8
11	王巍	0.27	0.5	0.3	91.06	8.68	11.48	247	24	42	94.62	8.68	11.59	23	11	13
12	王宣璎	0.27	0.32	0.2	27.01	9.13	8.56	91	28	33	28.95	9.68	8.94	16	8	8
13	王雪珺	0.29	2.41	0.63	26.99	11.41	10.05	66	30	36	27.77	11.71	10.05	16	9	9
14	王玉	0.29	0.27	0.2	198.8	15.24	31.74	544	53	114	207.07	16.39	32.42	49	17	32
15	吴夏辉	0.2	0.2	0.27	37.31	18.14	9.98	105	58	36	37.76	18.62	9.98	14	9	7
16	徐笑颖	0.38	0.37	0.35	37.43	3.28	9.48	99	7	32	39.17	3.45	9.89	16	6	8
17	张银玲	0.22	0.2	0.23	21.7	0.97	7.63	60	4	26	23.5	0.97	7.94	8	2	5
18	赵琳琳	0.28	0.12	0.18	15.75	0.12	4.89	59	1	24	17.42	0.12	5.83	9	1	7
19	宗文静	0.2	0.3	0.2	61.01	3.13	13.81	149	10	47	62.08	3.13	13.96	15	4	12
20	邹秦辉	0.2	0.68	0.23	10.48	5.11	4.53	37	14	14	10.97	5.11	4.8	12	6	6
All Recordings	Sum	4.52	7.88	5.18	966.99	123.35	200.37	2733	383	717	1014.6	127.19	205.65	330	136	194
	Mean	0.226	0.394	0.259	48.3495	6.1675	10.0185	136.65	19.15	35.85	50.73	6.3595	10.2825	16.5	6.8	10.06
	Stdev	0.08	0.49	0.11	0.24	0.18	0.14	116.74	16.76	21.46	3.61	1.14	0.91	8.74	4.26	5.97
整租-列表页
序号	姓名	First Fixation Duration			Fixation Duration			Fixation Count			Visit Duration			Visit Count
		info	pic	price	info	pic	price	info	pic	price	info	pic	price	info	pic	price
1	常家闻	0.23	0.15	0.18	48.84	3.16	14.66	143	11	55	50.44	3.28	15.04	22	6	16
2	党元萌	0.28	0.08	0.15	41.24	0.08	15.11	135	1	47	48.11	0.08	16.66	12	1	11
3	胡雨梦	0.25	0.3	0.3	18.18	4.18	2.7	47	14	11	18.73	4.18	3.2	13	8	4
	李思佳	0.27	0.53	0.19	16.99	15.62	3.05	43	53	10	17.12	16.07	3.05	13	11	6
4	李婉琪	0.29	0.25	0.12	79.85	15.21	11.96	246	57	45	91.81	16.55	12.59	36	26	15
5	刘博翔	0.27	0.28	0.4	26.75	12.99	8.01	76	31	26	26.75	13.19	8.01	14	9	5
	刘丽娟	0.25	0.13	0.37	6.44	7.78	4.96	22	23	16	7.13	8.83	5.3	5	4	3
6	农珺清	0.3	0.27	0.35	24.08	5.88	12.6	75	17	39	24.4	5.88	12.75	13	4	9
7	屈方元	0.25	0.08	0.52	37.96	1.03	14.22	98	4	46	38.64	1.03	14.45	16	4	15
8	王乐文	0.28	0.05	0.35	29.54	8.66	2.83	77	24	10	29.86	8.86	2.83	11	8	3
9	王巍	0.22	0.23	0.38	51.9	5.11	5.43	130	16	20	53.85	5.25	5.43	14	7	8
10	王宣璎	0.03	0.55	0.18	15.12	6.25	7.96	49	24	29	15.91	6.83	8.41	15	10	7
11	王雪珺	0.15	0.25	0.27	29.63	16.61	11.21	72	42	34	30.48	17.2	11.38	21	12	11
12	王玉	0.29	0.25	0.17	109.99	16.79	24.35	264	51	76	113.14	17.3	24.98	36	14	21
13	吴夏辉	0.2	0.17	0.18	10.73	5.26	3.54	26	19	13	10.73	5.26	3.54	10	10	3
14	徐笑颖	0.19	0.28	0.27	19.75	0.75	3.48	51	3	13	21.1	0.75	3.48	8	2	4
15	张银玲	0.32	0.13	0.15	23.23	6.75	7.96	66	26	30	24.91	7.21	8.64	13	7	5
16	赵琳琳	0.13	0.58	0.22	10.96	1.09	3.9	37	2	20	12.04	1.09	4.65	4	2	3
17	宗文静	0.3	0.24	0.18	49.32	6.02	12.24	133	22	42	50.12	6.02	12.24	12	7	5
18	邹秦辉	0.06	0.28	0.45	6.81	20.2	3.55	26	43	12	7.12	21	3.75	8	5	3
All Recordings	Sum	4.56	5.08	5.38	657.31	159.42	173.72	1816	483	594	692.39	165.86	180.38	296	157	157
	Mean	0.228	0.254	0.269	32.8655	7.971	8.686	90.8	24.15	29.7	34.6195	8.293	9.019	14.8	7.85	7.85
	Stdev	0.08	0.15	0.11	0.24	0.19	0.14	67.79	17.26	18.1	2.67	1.57	1.05	8.47	5.52	5.32

## Sheet: 详情页
合租-详情页
序号	姓名	First Fixation Duration								Fixation Duration								Fixation Count								Visit Duartion								Fixation Count
		付款信息区	基本信息区	交通与周边信息区	其它信息区	实景照片区	室友信息区	详细信息区	中介信息区	付款信息区	基本信息区	交通与周边信息区	其它信息区	实景照片区	室友信息区	详细信息区	中介信息区	付款信息区	基本信息区	交通与周边信息区	其它信息区	实景照片区	室友信息区	详细信息区	中介信息区	付款信息区	基本信息区	交通与周边信息区	其它信息区	实景照片区	室友信息区	详细信息区	中介信息区	付款信息区	基本信息区	交通与周边信息区	其它信息区	实景照片区	室友信息区	详细信息区	中介信息区
1	常家闻	0.17	0.15	0.23	0.17	0.18	0.13	0.42	0.23	15.21	0.36	13.06	0.82	3.61	1.58	0.67	0.43	58	28	35	3	18	8	2	2	15.21	10.01	13.06	0.82	3.61	1.58	0.67	0.43	7	6	8	1	11	4	2	1
2	党元萌	0.38	0.47	0.27	0.17	0.15	0.25	0.4	0.1	5.91	0.29	16.07	4.11	7.09	9.74	23.75	8.41	21	45	45	15	22	28	71	28	5.91	13.16	16.07	4.11	7.09	9.74	23.75	8.41	8	17	9	4	13	8	19	14
3	胡雨梦	0.22	0.1	0.27	0.3	0.33	0.13	0.35	0.47	5.1	0.23	3.86	2.07	2.96	6.73	5.83	1.8	23	27	14	9	13	24	23	4	5.1	6.3	3.86	2.07	2.96	6.73	5.83	1.8	3	17	3	2	9	8	7	3
4	李思佳	0.3	0.38	0.17	0.25	0.2	0.17	0.22	0.17	2.08	0.26	2.2	2.75	4.58	9.09	3.53	2	7	19	6	10	16	25	13	8	2.08	4.85	2.2	2.75	4.58	9.09	3.53	2	1	6	2	1	5	4	6	4
5	李婉琪	0.2	0.27	0.2	0.28	0.03	0.2	0.17	0.55	8.31	0.32	3.16	10.69	12.97	13.19	16.52	11.88	32	63	12	39	44	42	61	43	8.31	20.22	3.16	10.69	12.97	13.19	16.52	11.88	11	25	4	9	19	9	11	12
6	刘博翔	0.45	0.25	0.35	0.28	0.23	0.43	0.22	0.38	15.39	0.35	2.58	1.03	6.36	13.19	10.34	11.69	49	39	8	4	21	39	38	37	15.39	13.61	2.58	1.03	6.36	13.19	10.34	11.69	3	10	1	1	10	4	8	4
7	刘丽娟	-	0.05	-	-	0.47	-	0.12	0.17	-	0.28	-	-	6.26	-	5.25	3.28	-	56	-	-	28	-	16	11	-	15.68	-	-	6.26	-	5.25	3.28	-	22	-	-	19	-	11	6
8	农珺清	-	0.33	-	-	0.23	-	0.22	0.27	-	0.31	-	-	10.43	-	11.19	0.68	-	31	-	-	39	-	41	3	-	9.54	-	-	10.43	-	11.19	0.68	-	12	-	-	18	-	3	1
9	屈方元	0.22	0.13	0.17	0.35	0.03	0.37	0.18	0.27	7.51	0.4	9.39	2.95	4.53	13.61	5.18	5.05	21	35	26	13	19	43	19	19	7.51	14.09	9.39	2.95	4.53	13.61	5.18	5.05	4	10	3	5	9	6	5	2
10	王乐文	-	0.37	-	-	0.25	-	0.28	0.5	-	0.35	-	-	11.99	-	28.38	5.9	-	30	-	-	36	-	85	19	-	10.5	-	-	11.99	-	28.38	5.9	-	5	-	-	11	-	9	5
11	王巍	-	-	-	-	0.42	-	-	-	-	-	-	-	0.82	-	-	-	-	-	-	-	3	-	-	-	-	-	-	-	0.82	-	-	-	-	-	-	-	2	-	-	-
12	王宣璎	-	0.38	-	-	0.2	-	0.22	0.18	-	0.29	-	-	14.47	-	14.41	5.61	-	60	-	-	49	-	57	25	-	17.19	-	-	14.47	-	14.41	5.61	-	16	-	-	14	-	6	5
13	王雪珺	-	0.38	-	-	0.23	-	0.22	0.37	-	0.41	-	-	10.97	-	23.6	1.87	-	30	-	-	39	-	74	7	-	12.42	-	-	10.97	-	23.6	1.87	-	6	-	-	12	-	6	3
14	王玉	0.27	0.4	0.22	0.2	0.09	0.35	0.95	0.57	17.65	0.31	3.41	0.55	12.41	2.18	16.77	2.93	53	26	9	2	39	6	53	8	17.65	8.14	3.41	0.55	12.41	2.18	16.77	2.93	5	4	3	2	11	1	6	5
15	吴夏辉	0.1	0.6	0.18	0.18	0.22	0.13	0.53	0.18	1.93	0.33	1.7	0.42	12.56	11.08	14.41	4.6	8	20	7	2	31	33	48	16	1.93	6.7	1.7	0.42	12.56	11.08	14.41	4.6	4	2	3	1	6	3	3	3
16	徐笑颖	0.2	0.75	0.23	0.28	0.27	0.35	0.25	0.27	10.08	0.41	9.23	9.61	5.23	3.51	10.54	2.78	31	29	26	26	19	12	37	12	10.08	11.89	9.23	9.61	5.23	3.51	10.54	2.78	9	14	6	8	12	3	7	3
17	张银玲	-	0.25	0.2	-	0.09	0.25	0.2	0.32	-	0.32	7.51	-	5.85	14.91	19.27	6.03	-	23	33	-	27	54	70	23	-	7.29	7.51	-	6.02	14.91	19.27	6.03	-	11	10	-	10	12	15	10
18	赵琳琳	0.15	0.02	0.18	0.17	0.32	0.17	0.15	0.35	0.48	0.31	1.27	0.2	2.13	2.25	1.53	1.28	5	61	7	2	11	12	9	6	0.48	18.84	1.27	0.2	2.13	2.25	1.53	1.28	4	16	4	2	5	5	6	4
19	宗文静	0.2	0.2	0.48	0.65	0.11	0.27	0.17	0.23	4.39	0.38	14.06	3.11	8.41	13.14	17.89	7.66	16	29	40	11	32	38	58	30	4.39	10.94	14.06	3.11	8.41	13.14	17.89	7.66	9	8	6	7	14	10	17	11
20	邹秦辉	-	0.25	-	-	0.19	-	0.28	0.38	-	0.4	-	-	5.53	-	12.66	3.42	-	28	-	-	22	-	45	11	-	11.16	-	-	5.53	-	12.66	3.42	-	10	-	-	10	-	8	4
All Recordings	Sum	2.85	5.73	3.15	3.28	4.23	3.2	5.53	5.95	94.04	222.52	87.51	38.31	149.17	114.2	241.71	87.29	324	679	268	136	528	364	820	312	94.04	222.52	87.51	38.31	149.34	114.2	241.71	87.29	68	217	62	43	220	77	155	100
	Mean	0.24	0.3	0.24	0.27	0.21	0.25	0.29	0.31	0.29		0.33	0.28	0.28	0.31	0.29	0.28	27	35.74	20.62	11.33	26.4	28	43.16	16.42	1.38	1.03	1.41	0.89	0.68	1.48	1.56	0.87	5.67	11.42	4.77	3.58	11	5.92	8.16	5.26
	Stdev	0.1	0.18	0.09	0.13	0.11	0.1	0.19	0.14	0.15	0.22	0.24	0.14	0.18	0.18	0.15	0.13	18.13	14.22	14.1	11.24	12.06	15.18	24.29	11.88	1.94	1.04	1.59	0.82	0.83	1.85	2.04	1.06	3.06	6.23	2.8	2.97	4.53	3.23	4.63	3.74
整租-详情页
序号	姓名	First Fixation Duration								Fixation Duration								Fixation Count								Visit Duartion								Fixation Count
		付款信息区	基本信息区	交通与周边信息区	其它信息区	实景照片区	详细信息区	中介信息区		付款信息区	基本信息区	交通与周边信息区	其它信息区	实景照片区	详细信息区	中介信息区		付款信息区	基本信息区	交通与周边信息区	其它信息区	实景照片区	详细信息区	中介信息区		付款信息区	基本信息区	交通与周边信息区	其它信息区	实景照片区	详细信息区	中介信息区		付款信息区	基本信息区	交通与周边信息区	其它信息区	实景照片区	详细信息区	中介信息区
1	常家闻	0.35	0.57	0.17	-	0.14	0.18	0.32		11.56	12.96	6.4	-	5.44	0.67	1		44	47	20	-	26	3	3		11.56	12.96	6.4	-	5.44	0.67	1		5	12	6	-	13	1	3
2	党元萌	0.53	0.28	0.13	0.2	0.18	0.27	0.6		16.44	7.66	18.87	2.9	2.34	14.19	7.29		48	27	43	11	10	49	22		16.44	7.88	18.87	2.9	2.34	14.19	7.29		8	7	7	6	8	14	12
3	胡雨梦	0.35	0.42	0.48	0.32	0.17	0.35	0.23		4.15	6.85	2.68	0.55	3.28	2.93	0.63		14	23	9	2	14	11	3		4.55	7.39	2.68	0.55	3.46	2.93	0.63		1	5	3	1	10	6	1
4	李思佳	0.3	0.2	0.33	0.52	0.33	0.23	0.22		3.75	10.66	1.42	2.35	6.93	6.9	1.43		11	38	3	8	25	20	6		3.75	10.66	1.42	2.35	6.93	6.9	1.43		2	7	2	2	8	3	5
5	李婉琪	0.13	0.22	0.3	0.22	0.18	0.2	0.23		19.79	4.01	26.88	3.88	4.31	9.03	2.2		71	15	75	16	15	36	8		19.79	4.01	26.88	3.88	4.31	9.03	2.2		16	10	15	5	6	7	5
6	刘博翔	0.33	0.38	0.27	0.32	0.28	0.22	0.12		10.86	3.58	10.63	2.37	4.35	30.01	4.58		37	11	24	9	17	92	18		10.86	3.58	10.63	2.37	4.35	30.01	4.58		3	3	1	2	3	3	3
7	刘丽娟	-	0.25	-	-	0.23	0.1	0.08		-	11.63	-	-	11.11	18.4	4.83		-	35	-	-	33	62	21		-	11.63	-	-	11.11	18.4	4.83		-	15	-	-	17	17	7
8	农珺清	-	0.18	-	-	0.03	0.28	0.23		-	12.77	-	-	3.86	24.02	3.23		-	36	-	-	16	70	12		-	12.77	-	-	3.86	24.02	3.23		-	9	-	-	10	7	3
9	屈方元	0.27	0.27	0.22	0.1	0.17	0.25	0.45		0.72	15.59	4.73	0.28	1.97	8.99	0.87		2	48	17	2	9	31	3		0.72	15.59	4.73	0.28	1.97	8.99	0.87		1	11	3	1	5	4	3
10	王乐文	-	0.25	-	-	0.11	0.27	0.43		-	16.22	-	-	13.41	15.87	1.97		-	48	-	-	41	45	6		-	16.22	-	-	13.41	15.87	1.97		-	11	-	-	16	6	3
11	王巍	-	0.35	-	-	0.25	0.22	0.25		-	7.83	-	-	10.79	19.89	1.42		-	24	-	-	37	63	2		-	7.83	-	-	10.79	19.89	1.42		-	6	-	-	12	8	1
12	王宣璎	-	0.15	-	-	0.07	0.17	0.28		-	9.93	-	-	5.76	14.62	9.24		-	36	-	-	24	55	30		-	9.93	-	-	5.76	14.62	9.24		-	13	-	-	7	10	5
13	王雪珺	-	-	-	-	-	-	-		-	-	-	-	-	-	-		-	-	-	-	-	-	-		-	-	-	-	-	-	-		-	-	-	-	-	-	-
14	王玉	0.12	0.33	0.32	0.3	0.07	0.25	0.25		6.68	17.19	3.13	3.03	9.28	2.89	0.43		23	42	5	11	35	10	2		6.68	17.19	3.13	3.03	9.28	2.89	0.43		5	7	4	3	12	7	1
15	吴夏辉	0.2	0.23	0.2	0.23	0.02	0.23	0.33		4.23	3.71	0.8	1.43	3.6	19.62	0.33		15	14	3	7	13	65	1		4.23	3.71	0.8	1.43	3.6	19.62	0.33		3	4	3	4	5	11	1
16	徐笑颖	0.23	0.33	0.25	0.28	0.25	0.38	0.15		3.8	5.58	9.38	0.95	1.62	10.48	1.12		11	18	26	4	7	38	5		3.8	5.58	9.38	0.95	1.62	10.48	1.12		4	2	8	2	4	9	3
17	张银玲	0.17	0.33	0.25	0.38	0.21	0.25	0.15		18.97	9.79	16.71	3.23	10.84	14.87	6.65		71	31	41	14	48	49	19		18.97	9.79	16.71	3.23	10.84	14.87	6.65		14	10	10	3	19	10	6
18	赵琳琳	0.22	0.38	0.12	0.15	0.18	0.08	0.15		1.58	5.81	2.76	0.58	1	1.28	0.25		7	20	11	3	4	7	2		1.58	5.81	2.76	0.58	1	1.28	0.25		3	4	3	2	2	5	1
19	宗文静	0.38	0.28	0.17	0.27	0.29	0.25	0.2		7.09	8.71	4.78	1.83	2.97	28.13	4.93		23	23	13	6	12	80	17		7.09	8.71	4.78	1.83	2.97	28.13	4.93		4	5	2	3	2	7	3
20	邹秦辉	-	0.53	-	-	1.22	0.2	0.22		-	3.29	-	-	6.3	5.55	0.68		-	10	-	-	18	21	4		-	3.29	-	-	6.3	5.55	0.68		-	5	-	-	5	1	3
All Recordings	Sum	3.58	5.95	3.2	3.28	4.39	4.38	4.9		109.61	173.77	109.16	23.38	109.14	248.33	53.08		377	546	290	93	404	807	184		110.01	174.54	109.16	23.38	109.32	248.33	53.08		69	146	67	34	164	136	69
	Mean	0.28	0.31	0.25	0.27	0.23	0.23	0.26		0.29	0.32	0.38	0.25	0.27	0.31	0.29		29	28.74	22.31	7.75	21.26	42.47	9.68		1.59	1.2	1.63	0.69	0.67	1.83	0.77		5.31	7.68	5.15	2.83	8.63	7.16	3.63
	Stdev	0.12	0.11	0.1	0.11	0.25	0.07	0.13		0.13	0.2	0.26	0.09	0.16	0.16	0.16		23.33	12.56	20.5	4.63	12.48	26.03	8.75		1.43	1.16	1.95	0.45	0.75	2.85	0.75		4.7	3.67	3.98	1.53	5.1	4.13	2.69
